# Supplementary material for: Unique Habitual Food Intakes in the Gut Microbiota Cluster Associated with Type 2 Diabetes Mellitus
Source: MDPI journal article supplement (doi:10.3390/nu13113816), 2021-10-27
Supplement: s1 [file s1]

**Supplemental Table:**

Supplemental Table S1. The proportions of genera of all subjects.

| Groups                               | Red           | Blue          | Green         | Yellow        |
|--------------------------------------|---------------|---------------|---------------|---------------|
| g__Bacteroides                       | 0.107 (0.066) | 0.093 (0.056) | 0.061 (0.035) | 0.221 (0.077) |
| g__Bifidobacterium                   | 0.234 (0.123) | 0.050 (0.051) | 0.053 (0.048) | 0.040 (0.039) |
| g__Blautia                           | 0.045 (0.029) | 0.066 (0.037) | 0.059 (0.036) | 0.079 (0.047) |
| g__Faecalibacterium                  | 0.052 (0.044) | 0.068 (0.046) | 0.041 (0.034) | 0.065 (0.063) |
| f__Lachnospiraceae;g__unknown        | 0.042 (0.031) | 0.058 (0.032) | 0.039 (0.026) | 0.060 (0.044) |
| g__Ruminococcus                      | 0.040 (0.051) | 0.049 (0.052) | 0.082 (0.053) | 0.028 (0.031) |
| g__Collinsella                       | 0.046 (0.042) | 0.040 (0.037) | 0.061 (0.041) | 0.026 (0.027) |
| f__Ruminococcaceae;g__unknown        | 0.030 (0.030) | 0.033 (0.026) | 0.076 (0.056) | 0.025 (0.034) |
| g__Roseburia                         | 0.025 (0.033) | 0.058 (0.060) | 0.025 (0.031) | 0.038 (0.041) |
| f__Lachnospiraceae;g__[Ruminococcus] | 0.027 (0.021) | 0.030 (0.022) | 0.033 (0.028) | 0.051 (0.044) |
| g__Streptococcus                     | 0.030 (0.043) | 0.045 (0.062) | 0.018 (0.027) | 0.026 (0.046) |
| g__Coprococcus                       | 0.026 (0.023) | 0.027 (0.021) | 0.034 (0.027) | 0.028 (0.026) |
| g__Oscillospira                      | 0.020 (0.021) | 0.020 (0.017) | 0.061 (0.031) | 0.017 (0.013) |
| g__Prevotella                        | 0.011 (0.030) | 0.076 (0.101) | 0.019 (0.034) | 0.007 (0.015) |
| g__Escherichia                       | 0.026 (0.036) | 0.013 (0.029) | 0.017 (0.024) | 0.041 (0.080) |
| g__Lactobacillus                     | 0.056 (0.086) | 0.004 (0.007) | 0.004 (0.013) | 0.003 (0.009) |
| g__Parabacteroides                   | 0.013 (0.015) | 0.015 (0.021) | 0.017 (0.017) | 0.018 (0.016) |
| g__Dorea                             | 0.011 (0.020) | 0.012 (0.019) | 0.011 (0.011) | 0.017 (0.020) |
| g__Megamonas                         | 0.007 (0.024) | 0.030 (0.071) | 0.005 (0.017) | 0.010 (0.027) |
| g__SMB53                             | 0.008 (0.012) | 0.011 (0.021) | 0.022 (0.037) | 0.009 (0.013) |
| g__Phascolarctobacterium             | 0.007 (0.014) | 0.012 (0.014) | 0.014 (0.015) | 0.013 (0.012) |
| g__Akkermansia                       | 0.005 (0.016) | 0.009 (0.037) | 0.019 (0.043) | 0.007 (0.018) |
| o__Clostridiales;f__;g__             | 0.004 (0.009) | 0.004 (0.008) | 0.028 (0.037) | 0.004 (0.011) |
| g__Citrobacter                       | 0.007 (0.020) | 0.016 (0.045) | 0.008 (0.017) | 0.009 (0.023) |
| g__Megasphaera                       | 0.015 (0.034) | 0.011 (0.023) | 0.005 (0.012) | 0.007 (0.016) |

Data expressed as mean (SD).
